# Supplementary material for: Recombinant DNA technology and click chemistry: a powerful combination for generating a hybrid elastin-like-statherin hydrogel to control calcium phosphate mineralization
Source: publisher site journal article supplement (doi:10.3762/bjnano.8.80), 2017-04-04
Supplement: Additional file 1 [file 2190-4286-8-80-S1.pdf]

# **Recombinant DNA technology and click chemistry: a powerful combination for generating a hybrid elastin-like-statherin hydrogel to control calcium phosphate mineralization**

Mohamed Hamed Misbah<sup>1</sup>, Mercedes Santos<sup>1</sup>, Luis Quintanilla<sup>1</sup>, Christina Günter<sup>2</sup>, Matilde Alonso<sup>1</sup>, Andreas Taubert<sup>3</sup> and José Carlos Rodríguez-Cabello\*<sup>1</sup>

Address: <sup>1</sup>G.I.R. Bioforge, University of Valladolid, CIBER-BBN, Paseo de Belén 19, 47011 Valladolid, Spain, <sup>2</sup>Institute of Earth and Environmental Sciences, University of Potsdam, D-14476 Potsdam, Germany and <sup>3</sup>Institute of Chemistry, University of Potsdam, D-14476 Potsdam, Germany

Email: José Carlos Rodríguez-Cabello - roca@bioforge.uva.es

\* Corresponding Author

**MALDI-TOF spectra, NMR spectra, ATR-IR spectra, SEM micrographs, EDXS analysis are presented**

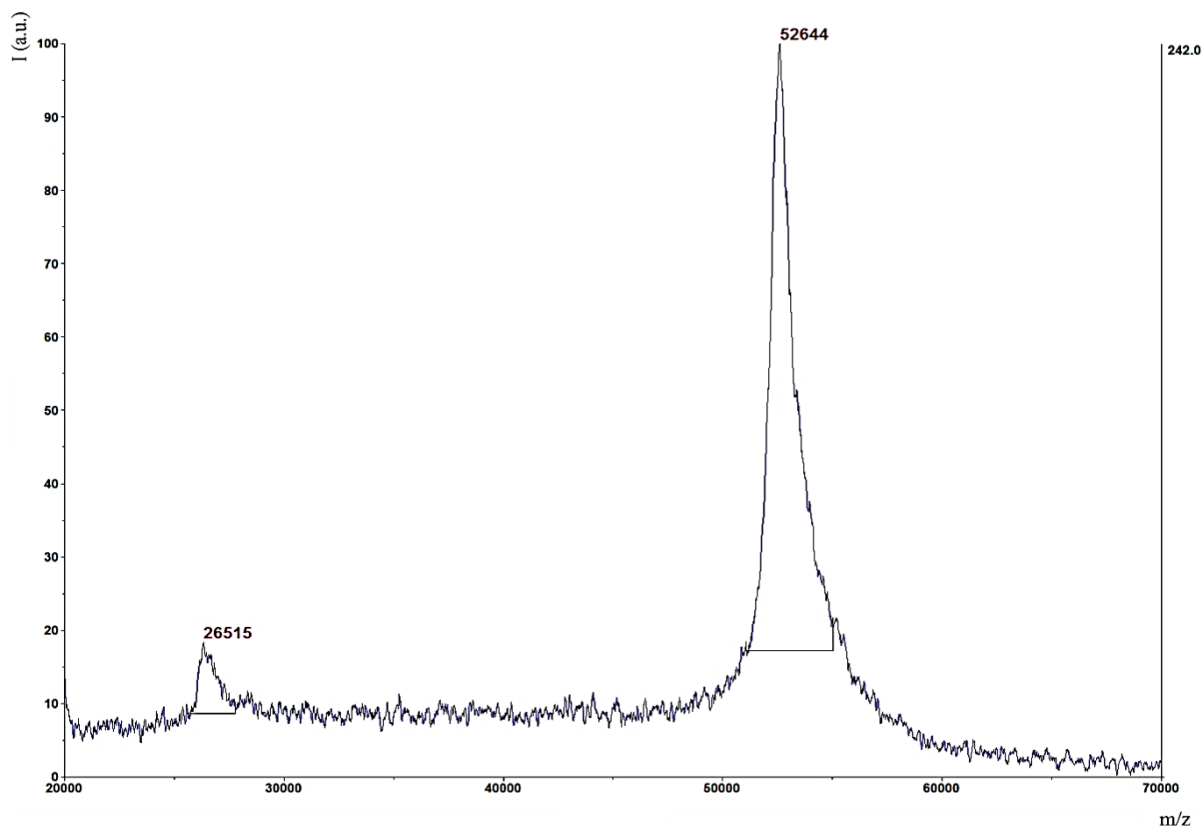

**Figure S1:** MALDI-TOF of the IK24 ELR modified with azide group.

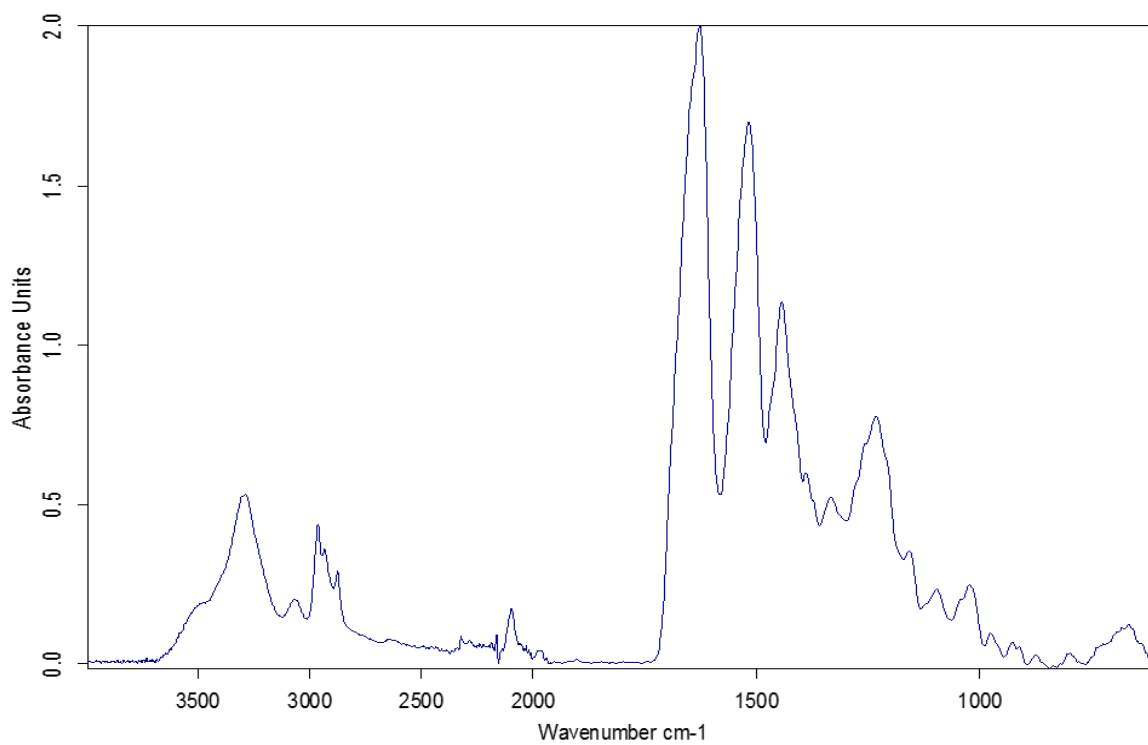

**Figure S2:** ATR of the IK24 ELR modified with the azide group.

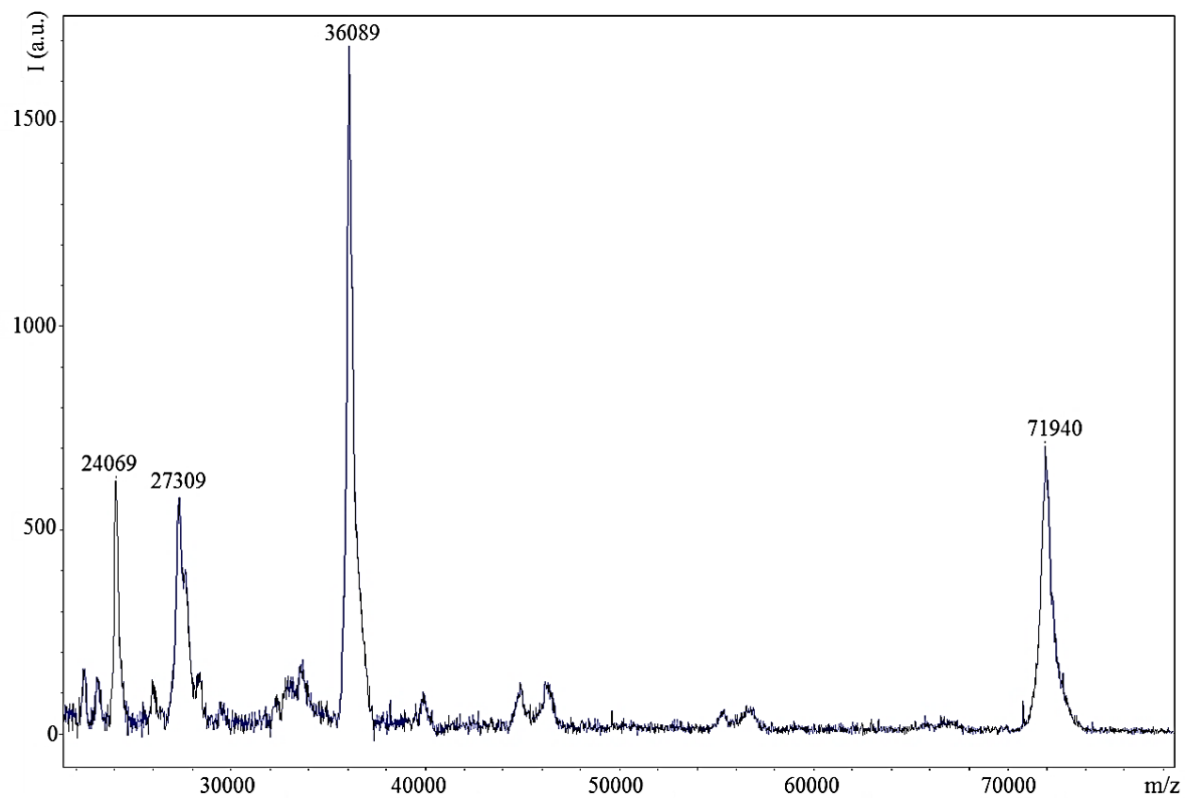

**Figure S3:** MALDI-TOF of the H3AH3 ELR modified with azide group.

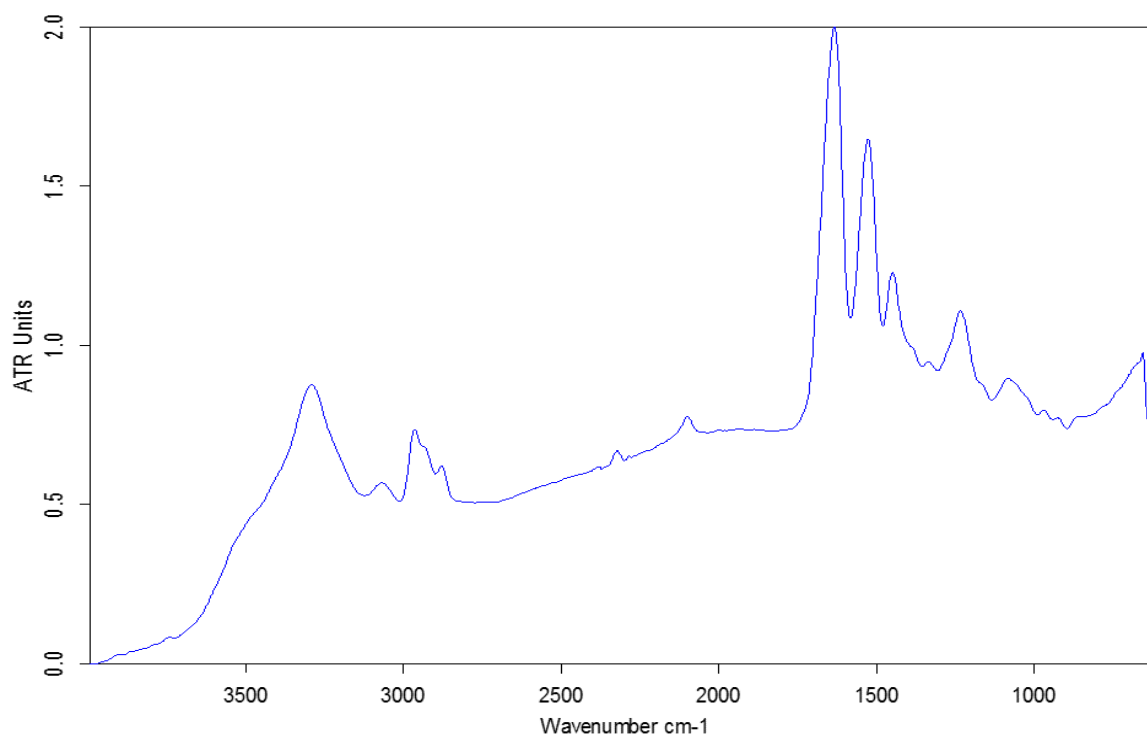

**Figure S4:** ATR of the H3AH3 ELR modified with azide group.

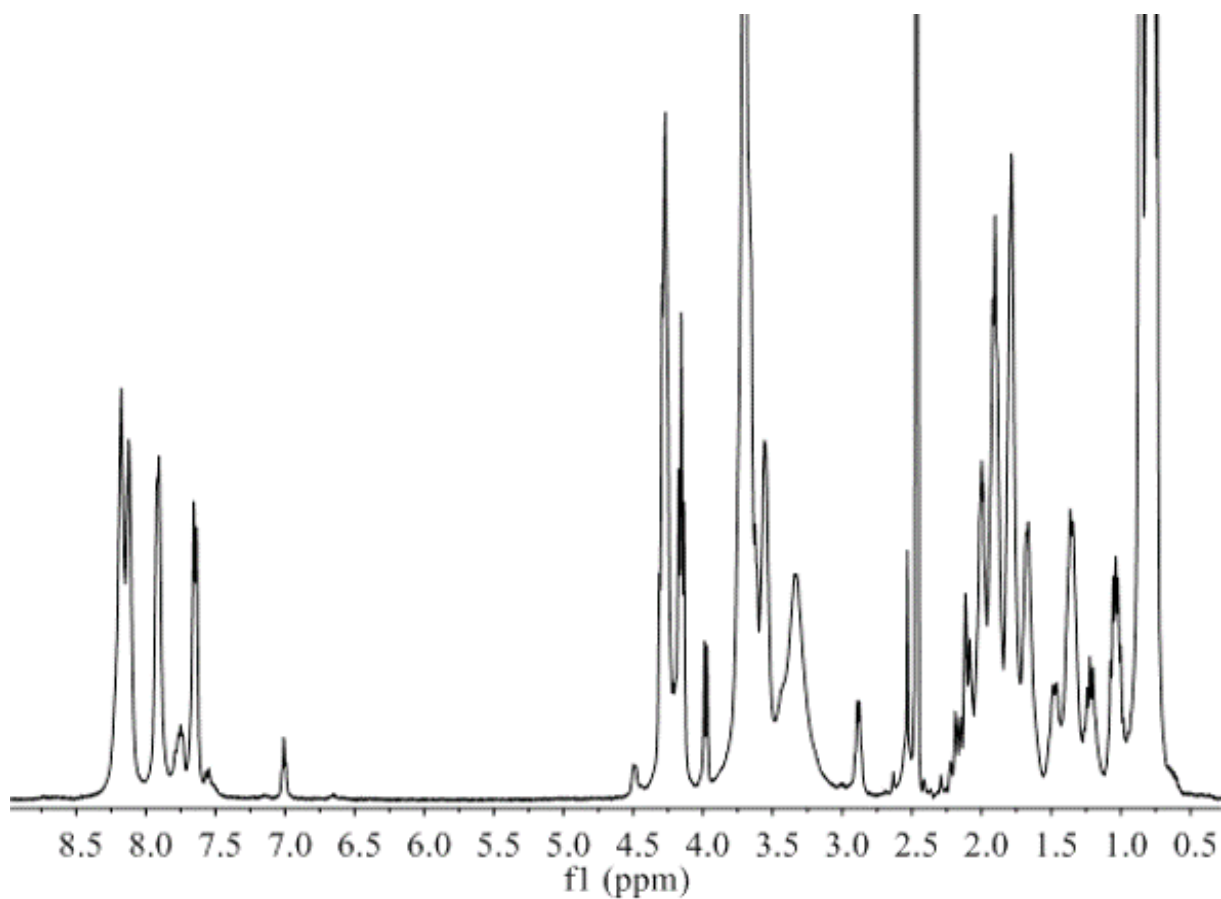

**Figure S5:** <sup>1</sup>H NMR in DMSO-*d*<sub>6</sub> of the IK24 ELR modified with cyclooctyne group.

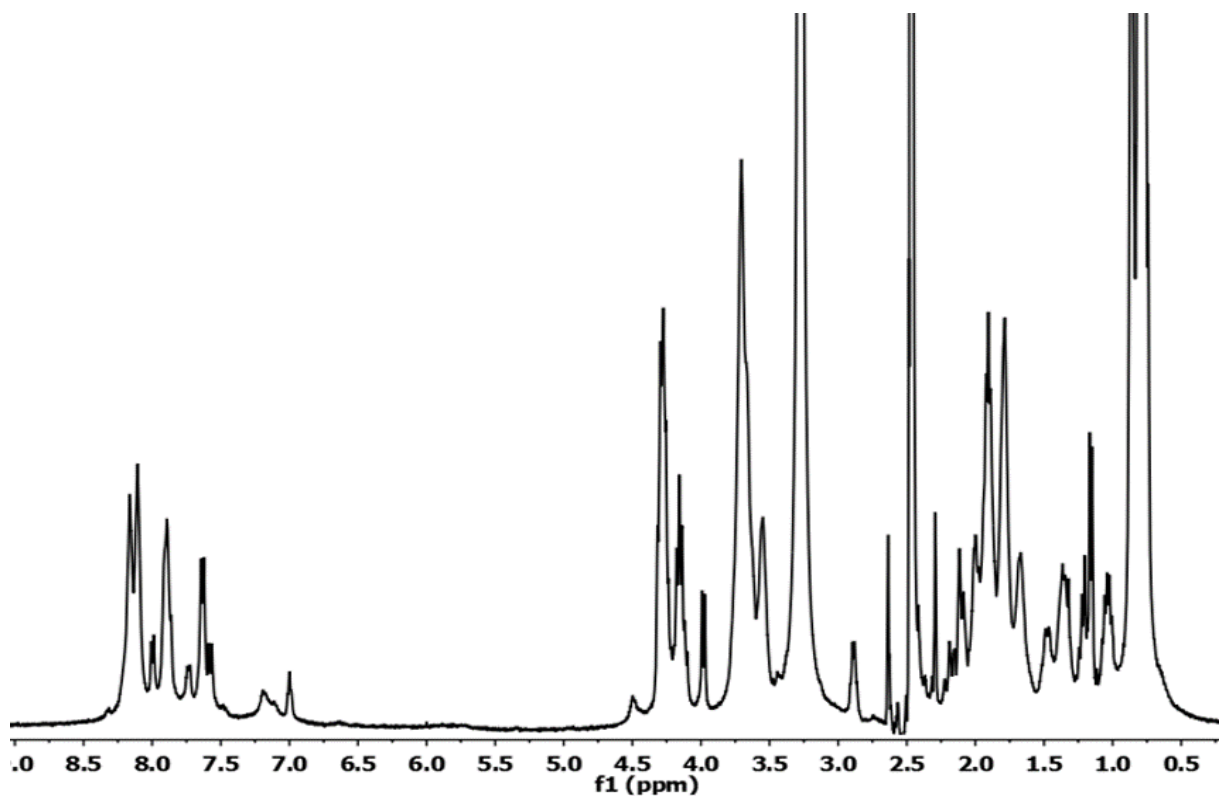

**Figure S6:** <sup>1</sup>H NMR in DMSO-*d*<sub>6</sub> of the H3AH3 ELR modified with cyclooctyne group.

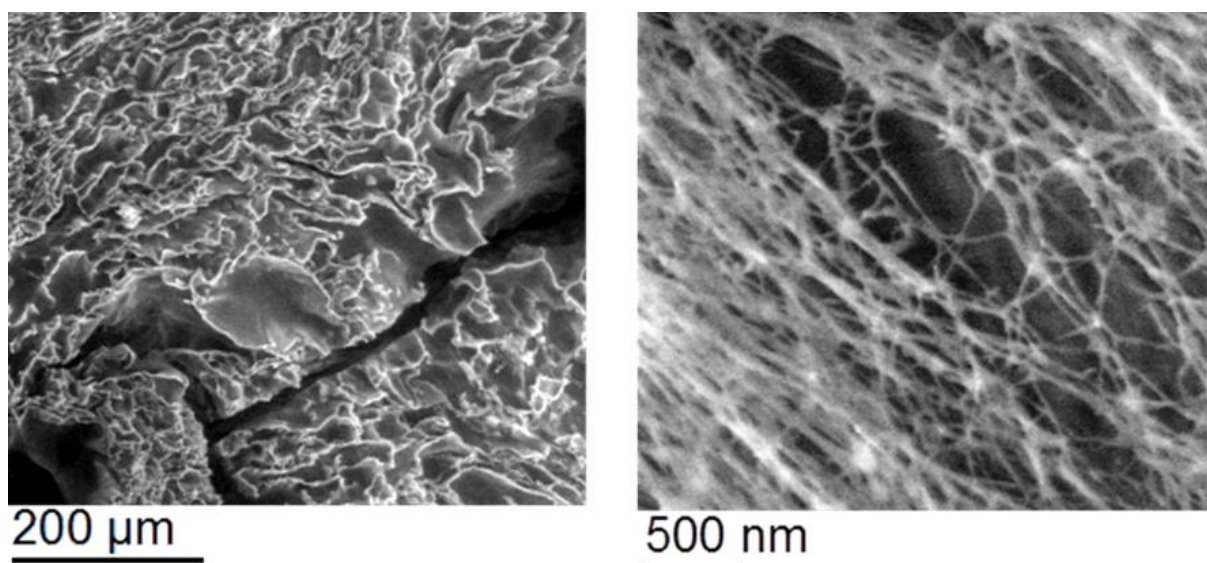

**Figure S7:** IK24 ELR hydrogel morphology observed by SEM.

**Table S1:** Elemental composition of the hydrogels after mineralization from EDXS. n.d. = not detected (detection limit of the instrument is 0.5%).

| Element     | IK24   |        |         | H3AH3  |        |         |
|-------------|--------|--------|---------|--------|--------|---------|
|             | 4 days | 8 days | 14 days | 4 days | 8 days | 14 days |
| <b>C K</b>  | 33.59  | 20.72  | 26.77   | 27.08  | 39.17  | 32.04   |
| <b>N K</b>  | 06.70  | n.d.   | n.d.    | 07.00  | n.d.   | 01.90   |
| <b>O K</b>  | 35.16  | 50.13  | 35.51   | 47.42  | 37.52  | 46.54   |
| <b>P K</b>  | 09.30  | 11.63  | 12.82   | 08.15  | 8.70   | 06.40   |
| <b>K K</b>  | 04.40  | 04.37  | n.d.    | 01.21  | 3.95   | n.d.    |
| <b>Cl K</b> | n.d.   | n.d.   | 5.41    | n.d.   | n.d.   | 01.72   |
| <b>Ca K</b> | 10.84  | 13.15  | 19.48   | 09.12  | 10.65  | 11.40   |

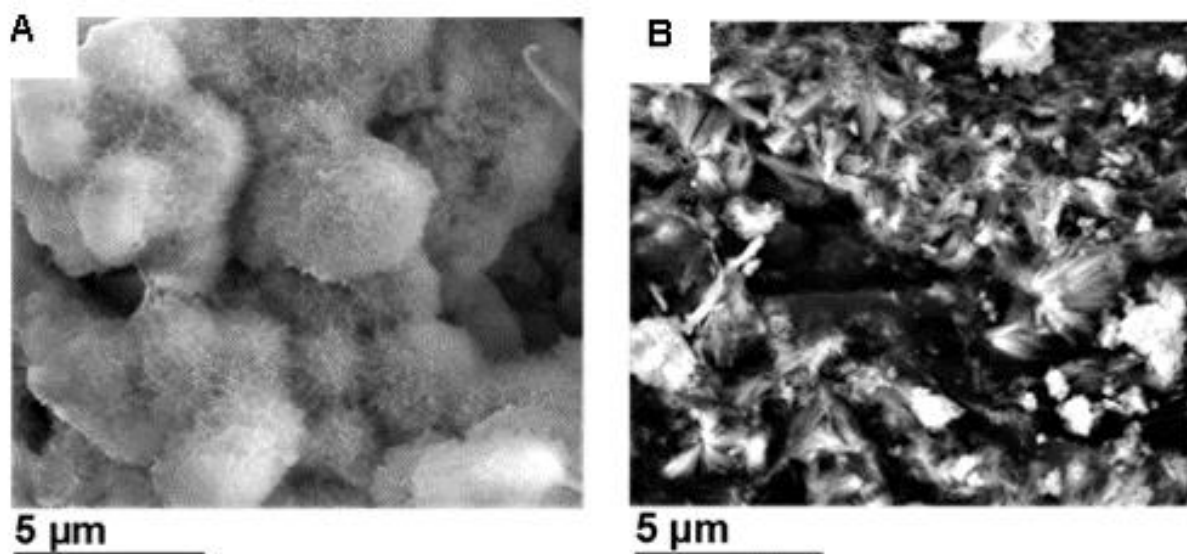

**Figure S8:** SEM of (A) Spherical- and (B) plate- like HA formed by the H3AH3 hydrogel after incubation for 14 days.
